# Supplementary material for: How Long to Continue Eyelid Hygiene to Treat Meibomian Gland Dysfunction
Source: MDPI journal article supplement (doi:10.3390/jcm11030529), 2022-01-20
Supplement: s1 [file s1]

Supplementary Figure Legends

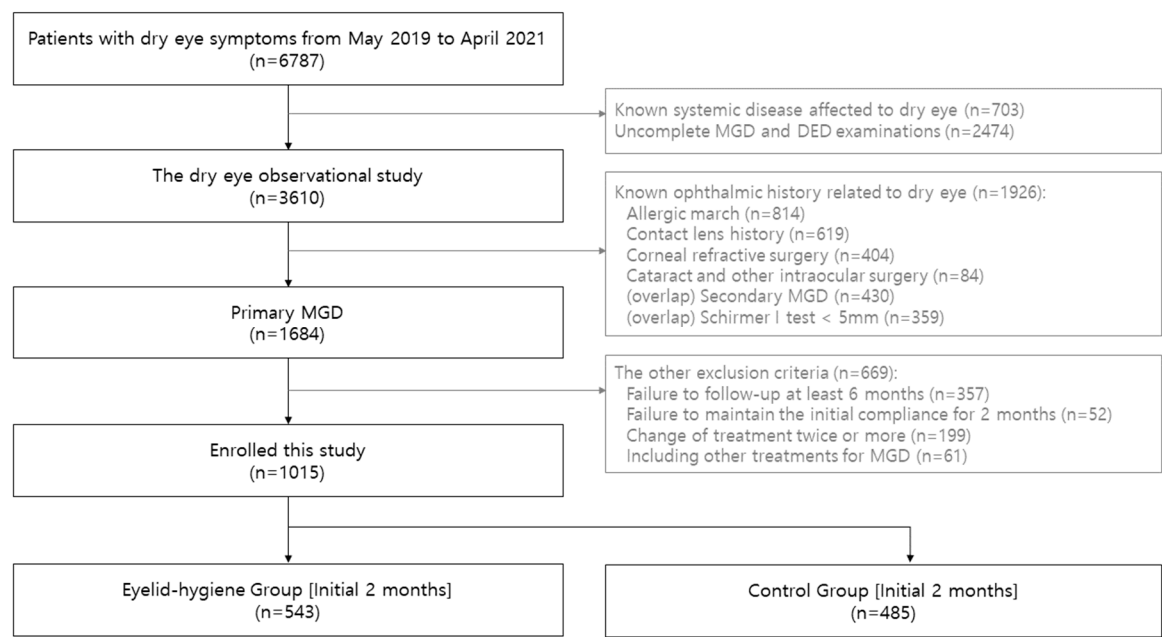

Scheme S1. Flow chart showing study participant selection.

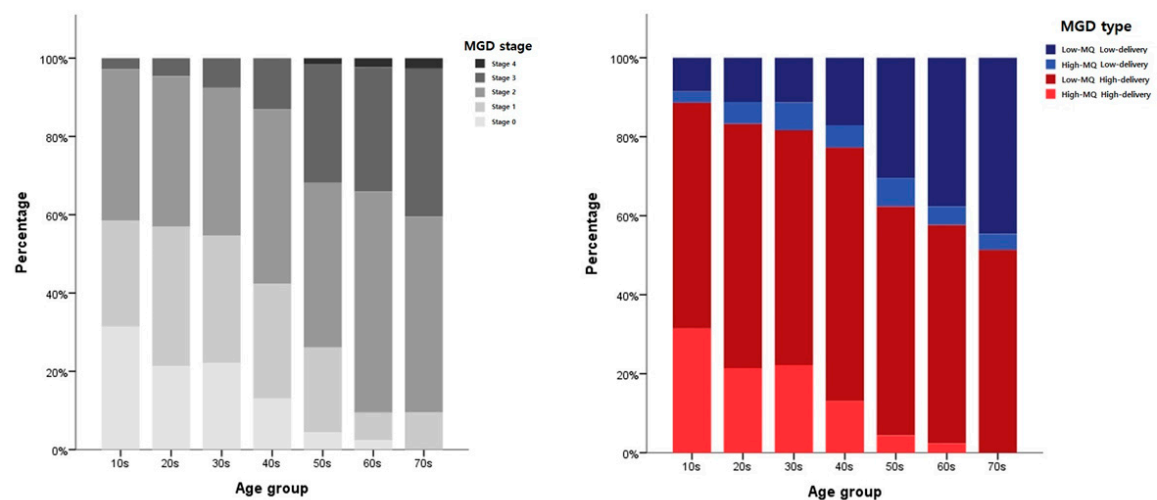

Scheme S2. The stages and types of meibomian gland dysfunction according to ages.
